# Supplementary material for: Antioxidants-Related Superoxide Dismutase (SOD), Catalase (CAT), Glutathione Peroxidase (GPX), Glutathione-S-Transferase (GST), and Nitric Oxide Synthase (NOS) Gene Variants Analysis in an Obese Population: A Preliminary Case-Control Study
Source: PubMed Central journal article supplement (PMC8070436; doi:10.3390/antiox10040595), 2021-04-13
Supplement: antioxidants-10-00595-s001.pdf [file antioxidants-10-00595-s001.pdf]

**Table S1:** The ready-made assay probe sequences applied in the present study

| Genes      | No | polymorphism    | Probe sequence                                           | Reference sequence (rs)<br>Assay ID |
|------------|----|-----------------|----------------------------------------------------------|-------------------------------------|
| <i>GST</i> | 1  | GSTM1 [C/T]     | GTATATTTGAGCCCAAGTGCTTGGGA[C/T]GCCTTCCCAAATCTGAAGGACTTCA | rs1056806<br>C_175674977_10         |
|            | 2  | GSTT1 [A/C]     | CTTCTTGAGGGGGTTCACCTGGGCA[A/C]AGGCATCGCTTAAGTGCTGACCTGG  | rs17856199<br>C_11214581_10         |
|            | 3  | GSTP1 [A/G]     | CGTGGAGGACCTCCGCTGCAAATAC[A/G]TCTCCCTCATCTACACCAACTATGT  | rs1695<br>C__3237198_20             |
|            | 4  | MGST3 [C/T]     | GACCCTGAGTGCAGGTTCCAGACGTC[C/T]AGAGGAAATGACTTGATGGTACGGA | rs2065942<br>C_11214581_10          |
| <i>SOD</i> | 5  | SOD1 [A/C]      | ATGCTTAACTCTTGTAATAATGGCG[A/C]TAGCTTTCTGGAGTTCATATGGTAT  | rs2234694<br>C_34770911_10          |
|            | 6  | SOD2 [A/G]      | CTGCCTGGAGCCCAGATACCCCAA[A/G]CCGGAGCCAGCTGCCTGCTGGTGCT   | rs4880<br>C__8709053_10             |
|            | 7  | SOD3 [A/G]      | CATGCAGCGGCGGGACGACGACGGC[A/G]CGCTCCACGCCCTGCCAGGTGCA    | rs2536512<br>C__2668728_10          |
| <i>CAT</i> | 8  | CAT [A/T]       | TTGGCTGAGCCTGAAGTCGCCACGG[A/T]CTCGGGGCAACAGGCAGATTTGCCT  | rs7943316<br>C__1883210_10          |
| <i>GPX</i> | 9  | GPX1 [G/A]      | CAGCGGAGCGCCCCGAACAAGCACT[G/A]TAAGGGGAGGCCAGCAGGCGCCTCC  | rs1800668<br>C__7912052_40          |
|            | 10 | GPX4 [C/T]      | CCGCCCCGAGCCCCTGCCACGCCCT[C/T]GGAGCCTTCCACCGGCACTCATGAC  | rs713041<br>C__2561693_20           |
| <i>NOS</i> | 11 | nNOS/NOS2 [A/G] | GTTGAGCTCTTTCAGCATGAAGAGC[A/G]ATTTCTTCAGTTTCTAGAAAGAGAG  | rs2297518<br>C_11889257_10          |
|            | 12 | eNOS/NOS3 [G/T] | CCCTGCTGCTGCAGGCCCCAGATGA[G/T]CCCCAGAACTCTTCTTCTGCCCC    | rs1799983<br>C__3219460_20          |

Data source: Thermo Fisher Scientific, Applied Biosystems, USA.
